# Supplementary material for: Clinicians’ attitudes and knowledge of medicinal cannabis in opioid dependence treatment clinics in New South Wales, Australia
Source: Springer Nature journal article supplement (doi:10.1186/s42238-025-00315-6), 2025-08-16
Supplement: MOESM1 [file 42238_2025_315_MOESM1_ESM.pdf]

**Clinicians' perspectives on medicinal cannabis in opioid dependence treatment clinics in New South Wales, Australia**

| <b>Sociodemographic</b> |                                                                                                                                                 |                                                                                                                                                                                                                                                                                                                                   |
|-------------------------|-------------------------------------------------------------------------------------------------------------------------------------------------|-----------------------------------------------------------------------------------------------------------------------------------------------------------------------------------------------------------------------------------------------------------------------------------------------------------------------------------|
| 1.1                     | How would you identify yourself?                                                                                                                | <input type="radio"/> Man, or male<br><input type="radio"/> Woman, or female<br><input type="radio"/> I use a different term<br><input type="radio"/> Prefer not to answer                                                                                                                                                        |
| 1.1a                    | Please tell us which gender identity you most readily identify as.                                                                              | -----<br>(Please specify)                                                                                                                                                                                                                                                                                                         |
| 1.2                     | Please let us know how old you are in years.                                                                                                    | -----<br>(Years old)                                                                                                                                                                                                                                                                                                              |
| 1.3                     | Which Local Health District or Health Network are you employed at?                                                                              |                                                                                                                                                                                                                                                                                                                                   |
| 1.4                     | In what capacity are you employed at your Local Health District or Local Health Network?                                                        | <input type="radio"/> Doctor<br><input type="radio"/> Registered Nurse<br><input type="radio"/> Psychologist<br><input type="radio"/> Social worker<br><input type="radio"/> Consumer worker<br><input type="radio"/> Pharmacist<br><input type="radio"/> Manager<br><input type="radio"/> Other<br><br>-----<br>(Please specify) |
| 1.4a                    | Please tell us in what level you are practicing? (if "Doctor")                                                                                  | <input type="radio"/> Staff specialist<br><input type="radio"/> Registrar<br><input type="radio"/> Resident Medical Officer<br><input type="radio"/> Career Medical Officer<br><input type="radio"/> Visiting Medical Officer                                                                                                     |
| 1.4b                    | Please tell us at what level of nursing you are practicing? (if "Registered Nurse")                                                             | <input type="radio"/> RN 1-3<br><input type="radio"/> RN 4-8<br><input type="radio"/> CNS1 or 2<br><input type="radio"/> CNC<br><input type="radio"/> NUM or NM                                                                                                                                                                   |
| 1.5                     | How many years have you worked in Opioid Treatment Program (OTP) services? (please provide a number).                                           | ----- (yrs)                                                                                                                                                                                                                                                                                                                       |
| 1.6                     | How many hours do you currently spend on average working in OTP each week?                                                                      | <input type="radio"/> Less than 10 hours<br><input type="radio"/> 11-20 hours<br><input type="radio"/> 21-20 hours<br><input type="radio"/> 31-40 hours<br><input type="radio"/> More than 40 hours                                                                                                                               |
| 1.7                     | What is your average OTP case load in the last three months (number of clients for whom you prescribe, or case manage or provide clinical care) | -----<br>(Please provide a number)                                                                                                                                                                                                                                                                                                |

**Clinicians' perspectives on medicinal cannabis in opioid dependence treatment clinics in New South Wales, Australia**

| <b>Medicinal Cannabis</b>                                                                                             |                                                                                                                                                                                                                                                                                                                                                                                                                                                                                                                                                                                                                            |                                                                                                                                                                                                                              |
|-----------------------------------------------------------------------------------------------------------------------|----------------------------------------------------------------------------------------------------------------------------------------------------------------------------------------------------------------------------------------------------------------------------------------------------------------------------------------------------------------------------------------------------------------------------------------------------------------------------------------------------------------------------------------------------------------------------------------------------------------------------|------------------------------------------------------------------------------------------------------------------------------------------------------------------------------------------------------------------------------|
| The following questions concern your perspectives on medicinal cannabis (e.g., THC, CBD, and THC-CBD based medicines) |                                                                                                                                                                                                                                                                                                                                                                                                                                                                                                                                                                                                                            |                                                                                                                                                                                                                              |
| 5.1                                                                                                                   | I believe that medicinal cannabis should be an option for some OTP clients to address their cannabis use.                                                                                                                                                                                                                                                                                                                                                                                                                                                                                                                  | <input type="radio"/> Strongly disagree<br><input type="radio"/> Disagree<br><input type="radio"/> Unsure<br><input type="radio"/> Neutral<br><input type="radio"/> Agree<br><input type="radio"/> strongly agree            |
| 5.2                                                                                                                   | I believe that medicinal cannabis should be an option for some OTP clients to address other health conditions (e.g., pain, mental health, sleep, palliative care).                                                                                                                                                                                                                                                                                                                                                                                                                                                         | <input type="radio"/> Strongly disagree<br><input type="radio"/> Disagree<br><input type="radio"/> Unsure<br><input type="radio"/> Neutral<br><input type="radio"/> Agree<br><input type="radio"/> strongly agree            |
| 5.3                                                                                                                   | What percentage of <i>your total OTP client caseload</i> do you think are currently accessing legally prescribed medicinal cannabis to treat any clinical condition?                                                                                                                                                                                                                                                                                                                                                                                                                                                       | <input type="radio"/> 0<br><input type="radio"/> 1-20%<br><input type="radio"/> 21-40%<br><input type="radio"/> 41-60%<br><input type="radio"/> 61-80%<br><input type="radio"/> 81-100%<br><input type="radio"/> Do not know |
| 5.4                                                                                                                   | What percentage of <i>your total OTP client caseload</i> have asked you about accessing medicinal cannabis products?                                                                                                                                                                                                                                                                                                                                                                                                                                                                                                       | <input type="radio"/> 0<br><input type="radio"/> 1-20%<br><input type="radio"/> 21-40%<br><input type="radio"/> 41-60%<br><input type="radio"/> 61-80%<br><input type="radio"/> 81-100%<br><input type="radio"/> Do not know |
| 5.5                                                                                                                   | <p>Please indicate the extent to which you “agree or disagree” with each of the following statements:</p> <p>“There is strong evidence for the use of medicinal cannabis containing <b>THC or THC-CBD combination</b> to treat the following conditions.”</p> <p>Neutral: The evidence is NOT CLEAR/EQUIVOCAL.</p> <p>Unsure: I am NOT FAMILIAR with evidence.</p> <p>Disagree: There IS NO STRONG evidence (insufficient to support routine clinical use as first- or second-line treatment).</p> <p>Agree: There IS STRONG evidence (sufficient to support routine clinical use as first- or second-line treatment).</p> |                                                                                                                                                                                                                              |
|                                                                                                                       | a. Cannabis dependence                                                                                                                                                                                                                                                                                                                                                                                                                                                                                                                                                                                                     | <input type="radio"/> Strongly disagree<br><input type="radio"/> Disagree<br><input type="radio"/> Neutral<br><input type="radio"/> Agree<br><input type="radio"/> strongly agree<br><input type="radio"/> Unsure            |

**Clinicians' perspectives on medicinal cannabis in opioid dependence treatment clinics in New South Wales, Australia**

|  |                       |                                                                                                                                                                                                                   |
|--|-----------------------|-------------------------------------------------------------------------------------------------------------------------------------------------------------------------------------------------------------------|
|  | b. Opiate withdrawal  | <input type="radio"/> Strongly disagree<br><input type="radio"/> Disagree<br><input type="radio"/> Neutral<br><input type="radio"/> Agree<br><input type="radio"/> strongly agree<br><input type="radio"/> Unsure |
|  | c. Chronic pain       | <input type="radio"/> Strongly disagree<br><input type="radio"/> Disagree<br><input type="radio"/> Neutral<br><input type="radio"/> Agree<br><input type="radio"/> strongly agree<br><input type="radio"/> Unsure |
|  | d. Anxiety            | <input type="radio"/> Strongly disagree<br><input type="radio"/> Disagree<br><input type="radio"/> Neutral<br><input type="radio"/> Agree<br><input type="radio"/> strongly agree<br><input type="radio"/> Unsure |
|  | e. PTSD               | <input type="radio"/> Strongly disagree<br><input type="radio"/> Disagree<br><input type="radio"/> Neutral<br><input type="radio"/> Agree<br><input type="radio"/> strongly agree<br><input type="radio"/> Unsure |
|  | f. Depression         | <input type="radio"/> Strongly disagree<br><input type="radio"/> Disagree<br><input type="radio"/> Neutral<br><input type="radio"/> Agree<br><input type="radio"/> strongly agree<br><input type="radio"/> Unsure |
|  | g. Sleep problems     | <input type="radio"/> Strongly disagree<br><input type="radio"/> Disagree<br><input type="radio"/> Neutral<br><input type="radio"/> Agree<br><input type="radio"/> strongly agree<br><input type="radio"/> Unsure |
|  | h. Palliative care    | <input type="radio"/> Strongly disagree<br><input type="radio"/> Disagree<br><input type="radio"/> Neutral<br><input type="radio"/> Agree<br><input type="radio"/> strongly agree<br><input type="radio"/> Unsure |
|  | i. Epilepsy           | <input type="radio"/> Strongly disagree<br><input type="radio"/> Disagree<br><input type="radio"/> Neutral<br><input type="radio"/> Agree<br><input type="radio"/> strongly agree<br><input type="radio"/> Unsure |
|  | j. Multiple sclerosis | <input type="radio"/> Strongly disagree<br><input type="radio"/> Disagree                                                                                                                                         |

**Clinicians' perspectives on medicinal cannabis in opioid dependence treatment clinics in New South Wales, Australia**

|     |                                                                                                                                                                                                                                                                                                                                                                                                                                                                                                                                                                                                |                                                                                                                                                                                                                   |
|-----|------------------------------------------------------------------------------------------------------------------------------------------------------------------------------------------------------------------------------------------------------------------------------------------------------------------------------------------------------------------------------------------------------------------------------------------------------------------------------------------------------------------------------------------------------------------------------------------------|-------------------------------------------------------------------------------------------------------------------------------------------------------------------------------------------------------------------|
|     |                                                                                                                                                                                                                                                                                                                                                                                                                                                                                                                                                                                                | <input type="radio"/> Neutral<br><input type="radio"/> Agree<br><input type="radio"/> strongly agree<br><input type="radio"/> Unsure                                                                              |
| 5.6 | <p>Please indicate the extent to which you “agree or disagree” with each of the following statements:</p> <p>“There is strong evidence for the use of <b>CBD-based medicinal cannabis</b> to treat the following conditions.”</p> <p>Neutral: The evidence is NOT CLEAR/EQUIVOCAL.</p> <p>Unsure: I am NOT FAMILIAR with evidence.</p> <p>Disagree: There IS NO STRONG evidence (insufficient to support routine clinical use as first- or second-line treatment).</p> <p>Agree: There IS STRONG evidence (sufficient to support routine clinical use as first- or second-line treatment).</p> |                                                                                                                                                                                                                   |
|     | a. Cannabis dependence                                                                                                                                                                                                                                                                                                                                                                                                                                                                                                                                                                         | <input type="radio"/> Strongly disagree<br><input type="radio"/> Disagree<br><input type="radio"/> Neutral<br><input type="radio"/> Agree<br><input type="radio"/> strongly agree<br><input type="radio"/> Unsure |
|     | b. Opiate withdrawal                                                                                                                                                                                                                                                                                                                                                                                                                                                                                                                                                                           | <input type="radio"/> Strongly disagree<br><input type="radio"/> Disagree<br><input type="radio"/> Neutral<br><input type="radio"/> Agree<br><input type="radio"/> strongly agree<br><input type="radio"/> Unsure |
|     | c. Chronic pain                                                                                                                                                                                                                                                                                                                                                                                                                                                                                                                                                                                | <input type="radio"/> Strongly disagree<br><input type="radio"/> Disagree<br><input type="radio"/> Neutral<br><input type="radio"/> Agree<br><input type="radio"/> strongly agree<br><input type="radio"/> Unsure |
|     | d. Anxiety                                                                                                                                                                                                                                                                                                                                                                                                                                                                                                                                                                                     | <input type="radio"/> Strongly disagree<br><input type="radio"/> Disagree<br><input type="radio"/> Neutral<br><input type="radio"/> Agree<br><input type="radio"/> strongly agree<br><input type="radio"/> Unsure |
|     | e. PTSD                                                                                                                                                                                                                                                                                                                                                                                                                                                                                                                                                                                        | <input type="radio"/> Strongly disagree<br><input type="radio"/> Disagree<br><input type="radio"/> Neutral<br><input type="radio"/> Agree<br><input type="radio"/> strongly agree<br><input type="radio"/> Unsure |

**Clinicians' perspectives on medicinal cannabis in opioid dependence treatment clinics in New South Wales, Australia**

|      |                                                                                                                                             |                                                                                                                                                                                                                   |
|------|---------------------------------------------------------------------------------------------------------------------------------------------|-------------------------------------------------------------------------------------------------------------------------------------------------------------------------------------------------------------------|
|      | f. Depression                                                                                                                               | <input type="radio"/> Strongly disagree<br><input type="radio"/> Disagree<br><input type="radio"/> Neutral<br><input type="radio"/> Agree<br><input type="radio"/> strongly agree<br><input type="radio"/> Unsure |
|      | g. Sleep problems                                                                                                                           | <input type="radio"/> Strongly disagree<br><input type="radio"/> Disagree<br><input type="radio"/> Neutral<br><input type="radio"/> Agree<br><input type="radio"/> strongly agree<br><input type="radio"/> Unsure |
|      | h. Palliative care                                                                                                                          | <input type="radio"/> Strongly disagree<br><input type="radio"/> Disagree<br><input type="radio"/> Neutral<br><input type="radio"/> Agree<br><input type="radio"/> strongly agree<br><input type="radio"/> Unsure |
| 5.7  | How confident are you in assisting clients to access prescribed medicinal cannabis?                                                         | <input type="radio"/> Very confident<br><input type="radio"/> Somewhat confident<br><input type="radio"/> Unsure<br><input type="radio"/> Not very confident<br><input type="radio"/> Not at all confident        |
| 5.8  | How confident are you regarding your understanding of the current regulatory requirements to provide medicinal cannabis to a client in NSW? | <input type="radio"/> Very confident<br><input type="radio"/> Somewhat confident<br><input type="radio"/> Neutral<br><input type="radio"/> Not very confident<br><input type="radio"/> Not at all confident       |
| 5.9  | Have you ever provided treatment with medicinal cannabis products for any client (not just OTP clients)                                     | <input type="radio"/> Yes<br><input type="radio"/> No                                                                                                                                                             |
| 5.10 | How concerned are you about each of the following potential adverse events / side effects of medicinal cannabis?                            |                                                                                                                                                                                                                   |
|      | a. Increased anxiety or depression                                                                                                          | <input type="radio"/> Not at all concerned<br><input type="radio"/> Not very concerned<br><input type="radio"/> Uncertain<br><input type="radio"/> Concerned<br><input type="radio"/> Very concerned              |
|      | b. Increased psychosis                                                                                                                      | <input type="radio"/> Not at all concerned<br><input type="radio"/> Not very concerned<br><input type="radio"/> Uncertain<br><input type="radio"/> Concerned<br><input type="radio"/> Very concerned              |
|      | c. Cognitive impairment (e.g. memory, slowed thinking)                                                                                      | <input type="radio"/> Not at all concerned<br><input type="radio"/> Not very concerned<br><input type="radio"/> Uncertain<br><input type="radio"/> Concerned<br><input type="radio"/> Very concerned              |

**Clinicians' perspectives on medicinal cannabis in opioid dependence treatment clinics in New South Wales, Australia**

|      |                                                                                                           |                                                                                                                                                                                                           |
|------|-----------------------------------------------------------------------------------------------------------|-----------------------------------------------------------------------------------------------------------------------------------------------------------------------------------------------------------|
|      | d. Interaction with other medications                                                                     | <input type="radio"/> Not at all concerned<br><input type="radio"/> Not very concerned<br><input type="radio"/> Uncertain<br><input type="radio"/> Concerned<br><input type="radio"/> Very concerned      |
|      | e. Over-sedation                                                                                          | <input type="radio"/> Not at all concerned<br><input type="radio"/> Not very concerned<br><input type="radio"/> Uncertain<br><input type="radio"/> Concerned<br><input type="radio"/> Very concerned      |
|      | f. Physical side effects (e.g. respiratory, cardiac)                                                      | <input type="radio"/> Not at all concerned<br><input type="radio"/> Not very concerned<br><input type="radio"/> Uncertain<br><input type="radio"/> Concerned<br><input type="radio"/> Very concerned      |
|      | g. Cannabis dependence                                                                                    | <input type="radio"/> Not at all concerned<br><input type="radio"/> Not very concerned<br><input type="radio"/> Uncertain<br><input type="radio"/> Concerned<br><input type="radio"/> Very concerned      |
|      | h. Non-medical use (e.g. diversion to others)                                                             | <input type="radio"/> Not at all concerned<br><input type="radio"/> Not very concerned<br><input type="radio"/> Uncertain<br><input type="radio"/> Concerned<br><input type="radio"/> Very concerned      |
|      | i. Driving-related problems                                                                               | <input type="radio"/> Not at all concerned<br><input type="radio"/> Not very concerned<br><input type="radio"/> Uncertain<br><input type="radio"/> Concerned<br><input type="radio"/> Very concerned      |
|      | j. Parenting-related problems                                                                             | <input type="radio"/> Not at all concerned<br><input type="radio"/> Not very concerned<br><input type="radio"/> Uncertain<br><input type="radio"/> Concerned<br><input type="radio"/> Very concerned      |
|      | k. Stigmatisation of clients                                                                              | <input type="radio"/> Not at all concerned<br><input type="radio"/> Not very concerned<br><input type="radio"/> Uncertain<br><input type="radio"/> Concerned<br><input type="radio"/> Very concerned      |
|      | l. Others (please list)                                                                                   | -----<br>----                                                                                                                                                                                             |
| 5.11 | What aspects of treatment with medicinal cannabis would you like to know more about (tick all that apply) | <input type="radio"/> Evidence of efficacy of medicinal cannabis for treating cannabis dependence<br><input type="radio"/> Evidence of efficacy of medicinal cannabis in treating other health conditions |

**Clinicians' perspectives on medicinal cannabis in opioid dependence treatment clinics in New South Wales, Australia**

|        |                                                                                                                             |                                                                                                                                                                                                                                                                                                                                                                                                                                                 |
|--------|-----------------------------------------------------------------------------------------------------------------------------|-------------------------------------------------------------------------------------------------------------------------------------------------------------------------------------------------------------------------------------------------------------------------------------------------------------------------------------------------------------------------------------------------------------------------------------------------|
|        |                                                                                                                             | <ul style="list-style-type: none"> <li>○ Indications and contraindications for medicinal cannabis</li> <li>○ Adverse events and their management</li> <li>○ Interaction with other medications and other substances</li> <li>○ Types of medicinal cannabis preparations</li> <li>○ Regulatory framework for accessing medicinal cannabis</li> <li>○ Pharmacokinetics</li> <li>○ Cost of medicinal cannabis products</li> <li>○ Other</li> </ul> |
| 5.11.a | If "other", please specify.                                                                                                 | -----                                                                                                                                                                                                                                                                                                                                                                                                                                           |
| 5.12   | Which education platform would be useful in providing education for prescribing medicinal cannabis? (tick all that applies) | <ul style="list-style-type: none"> <li>○ Clinical practice guidelines</li> <li>○ Training programs (face-to-face or online webinars)</li> <li>○ Self-directed E-learning</li> <li>○ Peer-reviewed literature (e.g., journal papers)</li> <li>○ Other</li> </ul>                                                                                                                                                                                 |
